# Supplementary material for: Real‑world survival outcome comparing abiraterone acetate plus prednisone and enzalutamide for nonmetastatic castration‐resistant prostate cancer
Source: PubMed Central journal article supplement (PMC10587977; doi:10.1002/cam4.6536), 2023-09-14
Supplement: CAM4-12-19414-s001.pdf [file CAM4-12-19414-s001.pdf]

# Supplementary Fig.1

## A

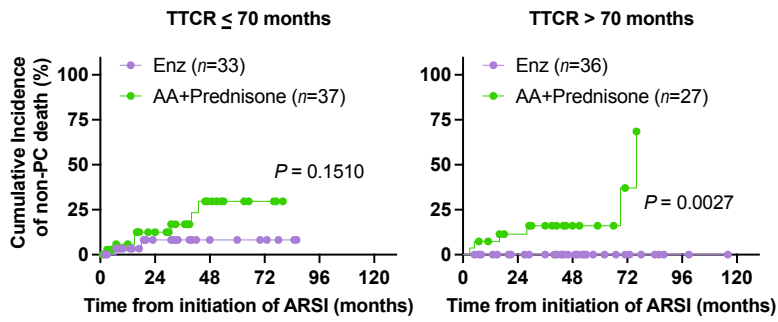

## B

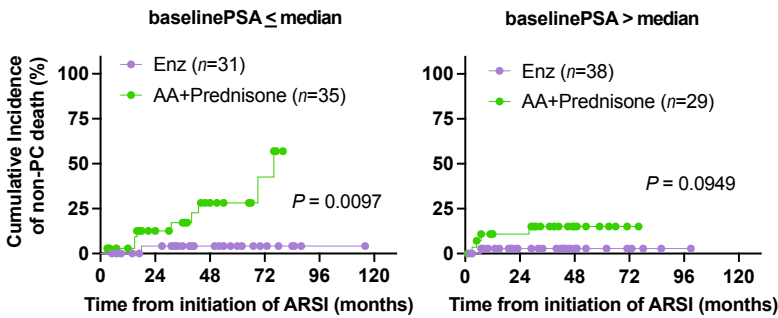

## C

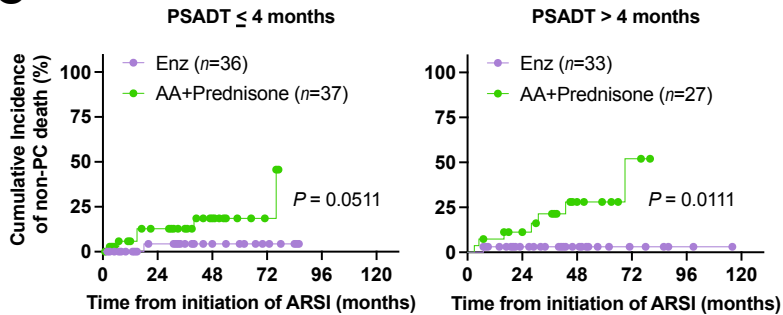

(A-C) Cumulative incidence plots of non-cancer-caused death from initiation of enzalutamide and abiraterone acetate plus prednisone in subgroups of time to castration resistance (B), baseline PSA value (C), and PSA doubling time (D).
